# Supplementary material for: Confirmation of Oryctes rhinoceros nudivirus infections in G-haplotype coconut rhinoceros beetles (Oryctes rhinoceros) from Palauan PCR-positive populations
Source: PubMed Central journal article supplement (PMC8452681; doi:10.1038/s41598-021-97426-w), 2021-09-20
Supplement: 41598_2021_97426_MOESM1_ESM.pdf [file 41598_2021_97426_MOESM1_ESM.pdf]

(A) Virus treated AnCu35 cells

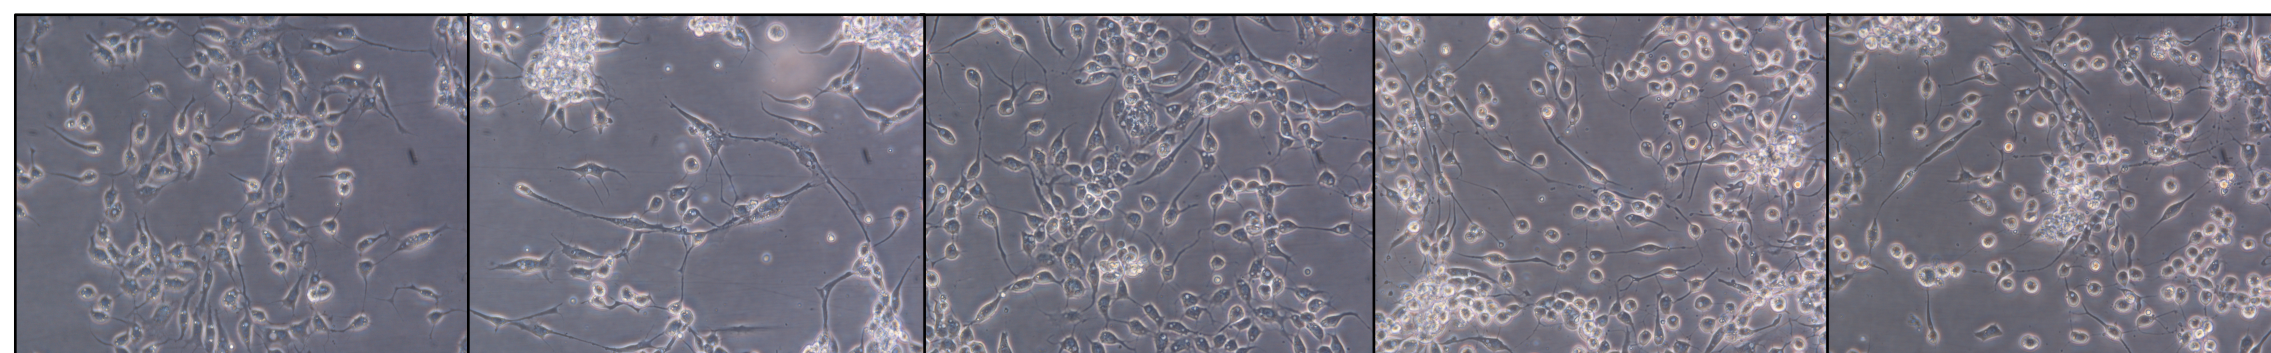

1 dpi

2 dpi

3 dpi

4 dpi

5 dpi

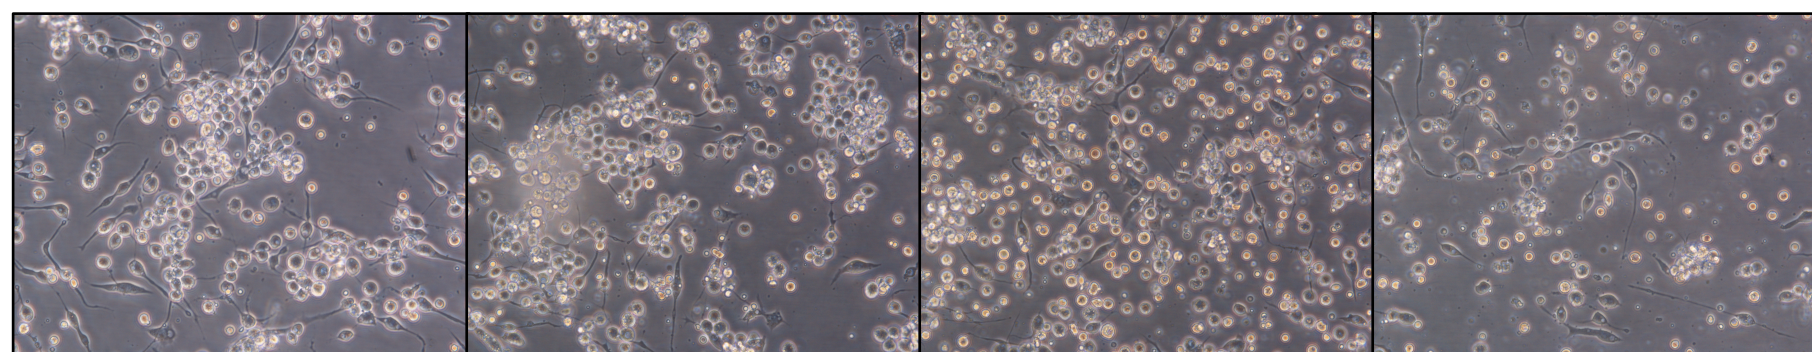

6 dpi

7 dpi

8 dpi

9 dpi

(B) Untreated AnCu35 cells

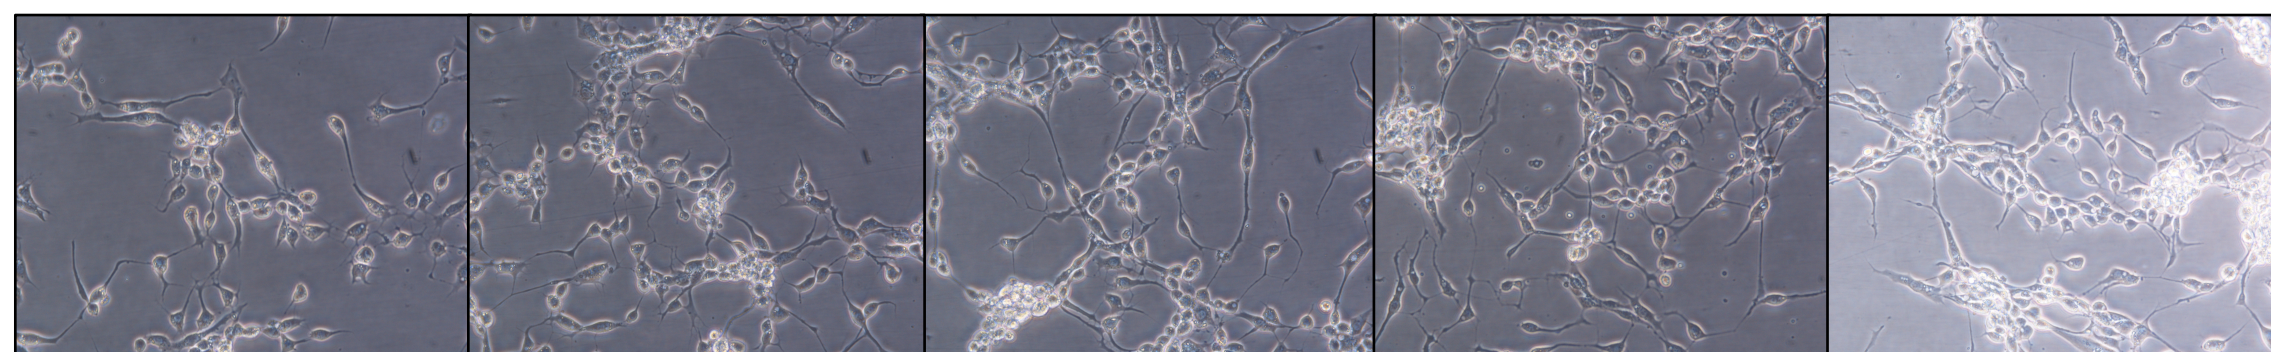

1 dpi

2 dpi

3 dpi

4 dpi

5 dpi

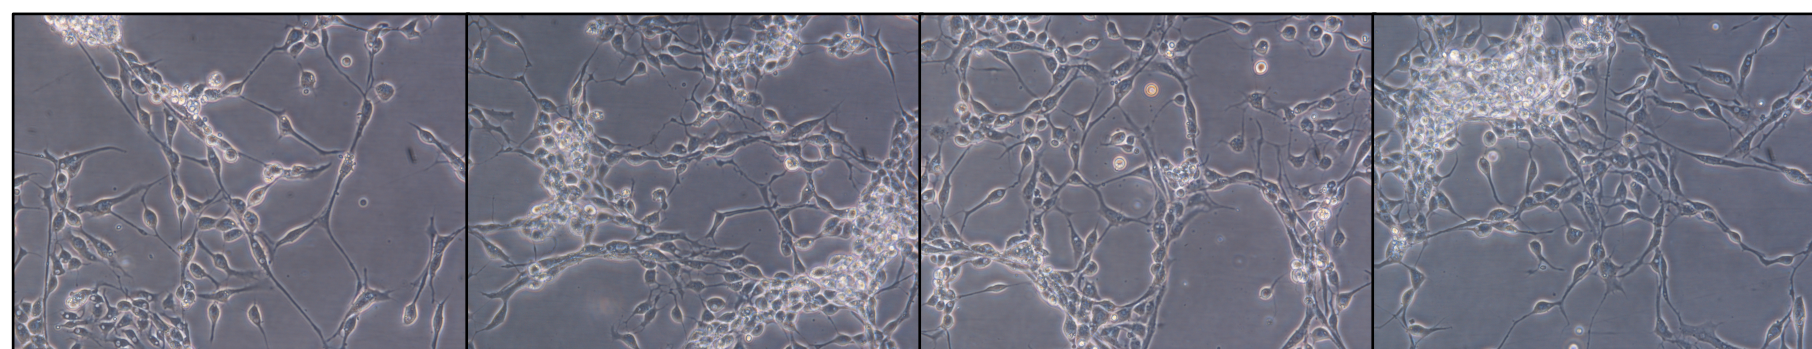

6 dpi

7 dpi

8 dpi

9 dpi

**Fig.S1. Optical micrographs of FRI-AnCu-35 (AnCu35) cells inoculated with OrNV X2B isolate.**

AnCu35 cells inoculated with OrNV X2B (A) were observed every day until 9 dpi and untreated healthy cells (B). Magnifications were all  $\times 400$ .
