# Supplementary material for: Confirmation of Oryctes rhinoceros nudivirus infections in G-haplotype coconut rhinoceros beetles (Oryctes rhinoceros) from Palauan PCR-positive populations
Source: PubMed Central journal article supplement (PMC8452681; doi:10.1038/s41598-021-97426-w), 2021-09-20
Supplement: 41598_2021_97426_MOESM2_ESM.pdf [file 41598_2021_97426_MOESM2_ESM.pdf]

Table S1. Open reading frames of isolates OrNV-Palau1

| ORF No. | Annotation                                                    | OrNV-Palau1 ORFs |        |      |           | BLAST best match |           |           |             |         |             |
|---------|---------------------------------------------------------------|------------------|--------|------|-----------|------------------|-----------|-----------|-------------|---------|-------------|
|         |                                                               | Start            | End    | aa   | Direction | OrNV_X2B         | %identity | OrNV_Maj7 | %identity   | OrNV_S1 | %identity   |
| 1       | diapyl B                                                      | 1                | 3843   | 1281 | forward   | 1                | 99.92     | 1         | 100         | 1       | 99.84       |
| 2       | putative trypsin-like serine protease                         | 3898             | 4917   | 340  | forward   | 2                | 100       | 2         | 100         | 2       | 100         |
| 3       | GrBNV_gp13-like protein                                       | 4928             | 6043   | 371  | forward   | 3                | 100       | 3         | 100         | 3       | 99.73       |
| 4       | Ae81-like protein                                             | 6067             | 6564   | 497  | forward   | 4                | 99.37     | 4         | 100         | 4       | 100         |
| 5       | arenavirus nucleocapsid C-terminal domain-like protein        | 7152             | 6580   | 191  | reverse   | 5                | 99.47     | 5         | 100         | 5       | 99.47       |
| 6       | thymidylate synthase/pyrimidine hydroxymethylase-like protein | 8164             | 7199   | 322  | reverse   | 6                | 99.69     | 6         | 99.69       | 6       | 99.69       |
| 7       | putative calcineurin-like phosphoesterase                     | 9042             | 8329   | 227  | reverse   | 7                | 99.66     | 7         | 99.66       | 7       | 99.64       |
| 8       | hypothetical protein                                          | 9301             | 9134   | 55   | forward   | 8                | 100       | 8         | 100         | 8       | 100         |
| 9       | NesCNPVORF52-like protein                                     | 9300             | 9965   | 222  | reverse   | 9                | 100       | 9         | 99.55       | 9       | 100         |
| 10      | hypothetical protein                                          | 10194            | 9994   | 67   | forward   | 10               | 100       | 10        | 92.31       | 10      | 90.77       |
| 11      | mitochondrial carrier protein-like protein                    | 10331            | 11119  | 262  | reverse   | 11               | 100       | 11        | 100         | 11      | 99.62       |
| 12      | adv-e66                                                       | 12930            | 11149  | 594  | reverse   | 12               | 99.66     | 12        | 99.66       | 12      | 99.66       |
| 13      | hypothetical protein                                          | 13584            | 12982  | 201  | reverse   | 13               | 100       | 13        | 100         | 13      | 100         |
| 14      | hypothetical protein                                          | 13796            | 13587  | 69   | reverse   | 14               | 100       | 14        | 100         | 14      | 100         |
| 15      | vp39 protein                                                  | 14469            | 13717  | 251  | forward   | 15               | 100       | 15        | 100         | 15      | 100         |
| 16      | FEN-1                                                         | 14537            | 15883  | 449  | reverse   | 16               | 100       | 16        | 99.78       | 16      | 100         |
| 17      | PIF-2                                                         | 17040            | 15916  | 375  | forward   | 17               | 100       | 17        | 100         | 17      | 100         |
| 18      | GrBNV_gp67-like protein                                       | 17181            | 18290  | 370  | forward   | 18               | 99.73     | 18        | 99.19       | 18      | 99.73       |
| 19      | Ac146-like protein                                            | 18312            | 18623  | 104  | forward   | 19               | 100       | 19        | 99.03       | 19      | 100         |
| 20      | P47                                                           | 18535            | 19589  | 324  | reverse   | 20               | 100       | 20        | 100         | 20      | 100         |
| 21      | hypothetical protein                                          | 20604            | 19579  | 341  | forward   | 21               | 99.71     | 21        | 99.71       | 21      | 99.71       |
| 22      | GrBNV_gp72-like protein                                       | 20603            | 21334  | 244  | reverse   | 22               | 99.18     | 22        | 100         | 22      | 99.18       |
| 23      | guanylate kinase-like protein                                 | 22218            | 21460  | 253  | reverse   | 23               | 100       | 23        | 100         | 23      | 100         |
| 24      | GrBNV_gp75-like protein                                       | 22839            | 22258  | 193  | forward   | 24               | 100       | 24        | 100         | 24      | 100         |
| 25      | GrBNV_gp76-like protein                                       | 22838            | 24496  | 553  | forward   | 25               | 99.64     | 25        | 99.64       | 25      | 99.46       |
| 26      | hypothetical protein                                          | 24557            | 25720  | 388  | reverse   | 26               | 100       | 26        | 100         | 26      | 100         |
| 27      | GrBNV_gp78-like protein                                       | 25961            | 25756  | 402  | forward   | 27               | 99.75     | 27        | 99.75       | 27      | 99.75       |
| 28      | hypothetical protein                                          | 26992            | 27328  | 279  | reverse   | 28               | 99.64     | 28        | 99.64       | 28      | 99.64       |
| 29      | GrBNV_gp81-like protein                                       | 28619            | 27840  | 259  | reverse   | 29               | 100       | 29        | 100         | 29      | 100         |
| 30      | VLF-1                                                         | 28486            | 30612  | 709  | forward   | 30               | 99.86     | 30        | 99.44       | 30      | 99.86       |
| 31      | hypothetical protein                                          | 31227            | 31382  | 51   | forward   | 31               | 100       | 31        | 94.87       | 31      | 100         |
| 32      | PIF-4                                                         | 32505            | 31738  | 256  | forward   | 32               | 99.61     | 32        | 100         | 32      | 100         |
| 33      | DNA helicase                                                  | 32620            | 36342  | 1241 | reverse   | 33               | 99.92     | 33        | 99.92       | 33      | 99.76       |
| 34      | hypothetical protein                                          | 36715            | 36422  | 98   | reverse   | 34               | 100       | 34        | 100         | 34      | 100         |
| 35      | hypothetical protein                                          | 37153            | 36731  | 141  | reverse   | 35               | 99.29     | 35        | 100         | 35      | 99.29       |
| 36      | PP78/83                                                       | 38140            | 37214  | 309  | reverse   | 36               | 99.35     | 36        | 99.35       | 36      | 99.35       |
| 37      | hypothetical protein                                          | 38453            | 38172  | 93   | reverse   | 37               | 100       | 37        | 100         | 37      | 100         |
| 38      | GrBNV_gp93-like protein                                       | 39107            | 38538  | 190  | forward   | 38               | 100       | 38        | 100         | 38      | 100         |
| 39      | GrBNV_gp94-like protein                                       | 39081            | 39479  | 132  | forward   | 39               | 100       | 39        | 100         | 39      | 100         |
| 40      | GrBNV_gp95-like protein                                       | 39451            | 39792  | 114  | forward   | 40               | 100       | 40        | 99.12       | 40      | 100         |
| 41      | LEF-1                                                         | 39768            | 40973  | 402  | forward   | 41               | 99.78     | 41        | 99.75       | 41      | 100         |
| 42      | hypothetical protein                                          | 41120            | 40965  | 51   | reverse   | 42               | 100       | 42        | 100         | 42      | 100         |
| 43      | GrBNV_gp97-like protein                                       | 41082            | 41672  | 197  | reverse   | 43               | 100       | 43        | 100         | 43      | 100         |
| 44      | GrBNV_gp23-like protein                                       | 42656            | 41685  | 324  | reverse   | 44               | 100       | 44        | 100         | 44      | 100         |
| 45      | GrBNV_gp22-like protein                                       | 44280            | 42709  | 524  | reverse   | 45               | 99.81     | 45        | 99.81       | 45      | 99.81       |
| 46      | GrBNV_gp19-like protein                                       | 45474            | 44482  | 331  | reverse   | 46               | 100       | 46        | 100         | 46      | 100         |
| 47      | hypothetical protein                                          | 45903            | 45742  | 54   | forward   | 47               | 96        | 47        | 96.23       | 47      | 96.23       |
| 48      | hypothetical protein                                          | 46312            | 46467  | 51   | forward   | 48               | 100       | 48        | 100         | 48      | 100         |
| 49      | RRI                                                           | 46634            | 48550  | 739  | reverse   | 49               | 100       | 49        | 99.73       | 49      | 99.86       |
| 50      | LEF-5                                                         | 49149            | 48913  | 79   | forward   | 50               | 100       | 50        | 100         | 50      | 100         |
| 51      | GrBNV_gp84-like protein                                       | 49840            | 49193  | 215  | forward   | 51               | 100       | 51        | 100         | 51      | 100         |
| 52      | GrBNV_gp83-like protein                                       | 50494            | 51813  | 439  | reverse   | 52               | 100       | 52        | 99.77       | 52      | 100         |
| 53      | hypothetical protein                                          | 51994            | 51797  | 65   | reverse   | 53               | 100       | 53        | 100         | 53      | 100         |
| 54      | hypothetical protein                                          | 53524            | 52175  | 450  | forward   | 54               | 99.56     | 54        | 99.55       | 54      | 99.56       |
| 55      | putative like phospholipase-like protein                      | 53657            | 54766  | 370  | reverse   | 55               | 99.73     | 55        | 100         | 55      | 99.73       |
| 56      | HZV_115-like thymidylate kinase-like protein                  | 55434            | 54805  | 210  | reverse   | 56               | 99.52     | 56        | 99.52       | 56      | 99.52       |
| 57      | LEF-3                                                         | 56037            | 55519  | 172  | reverse   | 57               | 100       | 57        | 100         | 57      | 100         |
| 58      | PIF-1                                                         | 57620            | 56145  | 492  | forward   | 58               | 99.8      | 58        | 100         | 58      | 100         |
| 59      | GrBNV_gp51-like protein                                       | 57705            | 58046  | 114  | forward   | 59               | 97.39     | 59        | 98.25       | 59      | 100         |
| 60      | hypothetical protein                                          | 58411            | 58145  | 89   | forward   | 60               | 100       | 60        | 100         | 60      | 100         |
| 61      | hypothetical protein                                          | 58365            | 58586  | 73   | forward   | 61               | 100       | 61        | 100         | 61      | 100         |
| 62      | LEF-8                                                         | 61380            | 58612  | 922  | reverse   | 62               | 100       | 62        | 100         | 62      | 100         |
| 63      | hypothetical protein                                          | 61848            | 61666  | 61   | reverse   | 63               | 100       | 63        | 100         | 63      | 100         |
| 64      | hypothetical protein                                          | 62368            | 62123  | 81   | reverse   | 64               | 70        | 64        | 72.13       | 64      | 100         |
| 65      | hypothetical protein                                          | 62918            | 62562  | 118  | reverse   | 65               | 99.12     | 65        | 77.78       | 65      | 100         |
| 66      | FIC-like protein                                              | 63215            | 63877  | 220  | forward   | 66               | 100       | 66        | 100         | 66      | 100         |
| 67      | hypothetical protein                                          | 64195            | 64875  | 227  | forward   | 67               | 99.12     | 67        | 99.56       | 67      | 99.12       |
| 68      | PIF-5                                                         | 65467            | 65057  | 69   | reverse   | 68               | 100       | 68        | 100         | 68      | 100         |
| 69      | hypothetical protein                                          | 65743            | 66528  | 261  | forward   | 69               | 99.28     | 69        | 100         | 69      | 99.23       |
| 70      | densovirus NS3-like protein                                   | 66656            | 67528  | 291  | forward   | 70               | 100       | 70        | 98.97       | 70      | 100         |
| 71      | integrase/recombinase-like protein                            | 68669            | 67575  | 365  | reverse   | 71               | 99.73     | 71        | 99.73       | 71      | 99.73       |
| 72      | GrBNV_gp58-like protein                                       | 68716            | 68871  | 52   | forward   | 72               | 100       | 72        | 100         | 72      | 100         |
| 73      | semaphorin-like protein                                       | 68964            | 69332  | 123  | forward   | 73               | 100       | 73        | 100         | 73      | 100         |
| 74      | semaphorin-like protein                                       | 69251            | 70645  | 464  | forward   | 74               | 100       | 74        | 100         | 74      | 100         |
| 75      | GrBNV_gp59-like protein                                       | 70656            | 70907  | 84   | forward   | 75               | 98.8      | 75        | 98.8        | 75      | 98.8        |
| 76      | GrBNV_gp60-like protein                                       | 71655            | 71068  | 196  | reverse   | 76               | 99.49     | 76        | 99.49       | 76      | 100         |
| 77      | hypothetical protein                                          | 71786            | 72115  | 110  | forward   | 77               | 58.82     | 77        | 80.73       | 77      | 100         |
| 78      | polysaccharide lyase family 6-like protein                    | 73738            | 72437  | 433  | reverse   | 78               | 99.1      | 78        | 99.49/97.56 | 78      | 99.48/97.56 |
| 79      | GrBNV_gp61-like protein                                       | 74565            | 73996  | 189  | reverse   | 79               | 100       | 79        | 100         | 79      | 100         |
| 80      | 38K                                                           | 74528            | 75367  | 279  | forward   | 80               | 100       | 80        | 100         | 80      | 100         |
| 81      | hypothetical protein                                          | 75371            | 75601  | 76   | forward   | 81               | 100       | 81        | 100         | 81      | 100         |
| 82      | hypothetical protein                                          | 76034            | 75747  | 96   | reverse   | 82               | 97.9      | 82        | 98.95       | 82      | 98.95       |
| 83      | GrBNV_gp28-like protein                                       | 79558            | 76382  | 1059 | reverse   | 83               | 99.24     | 83        | 99.53       | 83      | 99.34       |
| 84      | hypothetical protein                                          | 80265            | 80468  | 67   | forward   | 84               | 64.81     | 84        | 100         | 84      | 100         |
| 85      | hypothetical protein                                          | 80642            | 80445  | 65   | reverse   | 85               | 98.46     | 85        | 100         | 85      | 100         |
| 86      | hypothetical protein                                          | 80887            | 81201  | 105  | forward   | 86               | 98.08     | 86        | 100         | 86      | 99.04       |
| 87      | GrBNV_gp09-like protein                                       | 81265            | 82518  | 418  | forward   | 87               | 99.76     | 87        | 99.76       | 87      | 99.76       |
| 88      | LEF-9                                                         | 84362            | 82692  | 356  | reverse   | 88               | 99.8      | 88        | 99.82       | 88      | 99.64       |
| 89      | mRNA decapping enzyme 2-like protein                          | 84244            | 85029  | 262  | forward   | 89               | 99.62     | 89        | 99.24       | 89      | 100         |
| 90      | hypothetical protein                                          | 85613            | 85152  | 154  | reverse   | 90               | 100       | 90        | 100         | 90      | 100         |
| 91      | hypothetical protein                                          | 86103            | 86264  | 54   | forward   | 91               | 100       | 91        | 100         | 91      | 100         |
| 92      | hypothetical protein                                          | 86689            | 86408  | 94   | reverse   | 92               | 100       | 92        | 100         | 92      | 98.925      |
| 93      | RR2                                                           | 86710            | 87912  | 401  | forward   | 93               | 99.75     | 93        | 100         | 93      | 99.75       |
| 94      | hypothetical protein                                          | 88095            | 89180  | 361  | forward   | 94               | 99.72     | 94        | 98.61       | 94      | 99.72       |
| 95      | GrBNV_gp62-like protein                                       | 89464            | 89177  | 96   | reverse   | 95               | 100       | 95        | 98.95       | 95      | 100         |
| 96      | GrBNV_gp43-like protein                                       | 90588            | 89521  | 356  | reverse   | 96               | 99.72     | 96        | 99.72       | 96      | 99.72       |
| 97      | VP19                                                          | 90681            | 92660  | 660  | forward   | 97               | 99.85     | 97        | 100         | 97      | 99.85       |
| 98      | PIF-3                                                         | 92703            | 93317  | 205  | forward   | 98               | 100       | 98        | 100         | 98      | 100         |
| 99      | DNA helicase 2                                                | 95848            | 93386  | 821  | reverse   | 99               | 100       | 99        | 100         | 99      | 100         |
| 100     | hypothetical protein                                          | 96427            | 96693  | 88   | reverse   | 100              | 98.86     | 100       | 98.86       | 100     | 98.86       |
| 101     | hypothetical protein                                          | 96716            | 96925  | 70   | forward   | 101              | 100       | 101       | 100         | 101     | 100         |
| 102     | hypothetical protein                                          | 97181            | 97333  | 50   | forward   | 102              | 98        | 102       | 100         | 102     | 100         |
| 103     | hypothetical protein                                          | 97484            | 97636  | 50   | forward   | 103              | 96        | 103       | 98          | 103     | 98          |
| 104     | P33                                                           | 99015            | 97741  | 425  | reverse   | 104              | 100       | 104       | 99.76       | 104     | 100         |
| 105     | GrBNV_gp06-like protein                                       | 99181            | 100596 | 472  | forward   | 105              | 99.79     | 105       | 99.79       | 105     | 99.58       |
| 106     | PIF-5                                                         | 100809           | 102044 | 412  | forward   | 106              | 100       | 106       | 99.76       | 106     | 99.52       |
| 107     | GrBNV_gp33-like protein                                       | 103102           | 102041 | 354  | reverse   | 107              | 100       | 107       | 100         | 107     | 100         |
| 108     | hypothetical protein                                          | 104171           | 103155 | 338  | reverse   | 108              | 100       | 108       | 100         | 108     | 100         |
| 109     | GrBNV_gp55-like protein                                       | 104170           | 104061 | 264  | forward   | 109              | 112       | 109       | 100         | 109     | 100         |
| 110     | GrBNV_gp36-like protein                                       | 105022           | 106152 | 376  | forward   | 110              | 113       | 110       | 112         | 110     | 100         |
| 111     | GrBNV_gp37-like protein                                       | 108260           | 106215 | 682  | reverse   | 111              | 99.41     | 111       | 99.71       | 111     | 99.71       |
| 112     | DNA ligase                                                    | 109429           | 108356 | 358  | reverse   | 112              | 100       | 112       | 100         | 112     | 100         |
| 113     | GrBNV_gp39-like protein                                       | 109460           | 109942 | 161  | forward   | 113              | 99.38     | 113       | 99.38       | 113     | 99.38       |
| 114     | GrBNV_gp41-like protein                                       | 110375           | 109947 | 143  | reverse   | 114              | 100       | 114       | 100         | 114     | 100         |
| 115     | hypothetical protein                                          | 111600           | 110556 | 415  | reverse   | 115              | 98.79     | 115       | 98.55       | 115     | 99.03       |
| 116     | GrBNV_gp44-like protein                                       | 112682           | 111663 | 340  | reverse   | 116              | 99.71     | 116       | 99.41       | 116     | 99.71       |
| 117     | p74                                                           | 112796           | 115006 | 737  |           |                  |           |           |             |         |             |
