# Supplementary material for: Confirmation of Oryctes rhinoceros nudivirus infections in G-haplotype coconut rhinoceros beetles (Oryctes rhinoceros) from Palauan PCR-positive populations
Source: PubMed Central journal article supplement (PMC8452681; doi:10.1038/s41598-021-97426-w), 2021-09-20
Supplement: 41598_2021_97426_MOESM3_ESM.pdf [file 41598_2021_97426_MOESM3_ESM.pdf]

Table S2. Open reading frames of isolates OnNV\_X2B

| ORF No. | Annotation                                                    | ONV_X2B ORF |        |      |           | Homology in other isolates |             |         |             |
|---------|---------------------------------------------------------------|-------------|--------|------|-----------|----------------------------|-------------|---------|-------------|
|         |                                                               | Start       | End    | aa   | Direction | OnNV_Ma07                  |             | OnNV_S1 |             |
|         |                                                               |             |        |      |           | ORF No.                    | %identity   | ORF No. | %identity   |
| 1       | disulf B                                                      | 1           | 3843   | 1281 | forward   | 1                          | 99.92       | 1       | 99.92       |
| 2       | putative trypsin-like serine protease                         | 3898        | 4917   | 340  | forward   | 2                          | 100         | 2       | 100         |
| 3       | GrBNV_gp13-like protein                                       | 4928        | 6043   | 371  | forward   | 3                          | 99.73       | 3       | 99.73       |
| 4       | Ac81-like protein                                             | 6067        | 6564   | 165  | forward   | 4                          | 99.39       | 4       | 99.39       |
| 5       | Arenavirus nucleocapsid C-terminal domain-like protein        | 7155        | 6583   | 572  | reverse   | 5                          | 99.47       | 5       | 100         |
| 6       | thymidylate synthase/pyrimidine hydroxymethylase-like protein | 8167        | 7202   | 322  | reverse   | 6                          | 100         | 6       | 100         |
| 7       | putative calicivirus-like phosphoesterase                     | 9045        | 8212   | 332  | reverse   | 7                          | 100         | 7       | 100         |
| 8       | hypothetical protein                                          | 9304        | 9137   | 55   | reverse   | 8                          | 100         | 8       | 100         |
| 9       | NucleoNPORF52-like protein                                    | 9303        | 9968   | 222  | forward   | 9                          | 99.55       | 9       | 100         |
| 10      | hypothetical protein                                          | 10197       | 9997   | 67   | reverse   | 10                         | 92.31       | 10      | 90.77       |
| 11      | mitochondrial carrier protein-like protein                    | 10334       | 11122  | 263  | forward   | 11                         | 100         | 11      | 99.62       |
| 12      | adv-e66-like protein                                          | 12933       | 11152  | 604  | reverse   | 12                         | 99.66       | 12      | 100         |
| 13      | hypothetical protein                                          | 13587       | 12985  | 201  | reverse   | 13                         | 100         | 13      | 100         |
| 14      | hypothetical protein                                          | 13799       | 13590  | 69   | reverse   | 14                         | 100         | 14      | 100         |
| 15      | gp39-like protein                                             | 14472       | 13720  | 251  | reverse   | 15                         | 100         | 15      | 100         |
| 16      | polh/gag                                                      | 14540       | 15886  | 449  | forward   | 16                         | 99.78       | 16      | 100         |
| 17      | pf2 protein                                                   | 17043       | 15919  | 375  | reverse   | 17                         | 100         | 17      | 100         |
| 18      | GrBNV_gp67-like protein                                       | 17184       | 18293  | 370  | forward   | 18                         | 99.46       | 18      | 100         |
| 19      | Ac146-like protein                                            | 18315       | 18626  | 103  | forward   | 19                         | 99.03       | 19      | 100         |
| 20      | gp47 protein                                                  | 18538       | 19512  | 324  | forward   | 20                         | 100         | 20      | 100         |
| 21      | hypothetical protein                                          | 20097       | 19582  | 341  | reverse   | 21                         | 100         | 21      | 100         |
| 22      | GrBNV_gp72-like protein                                       | 20906       | 21331  | 242  | forward   | 22                         | 99.18       | 22      | 100         |
| 23      | myristic acid kinase-like protein                             | 22216       | 21458  | 253  | reverse   | 23                         | 100         | 23      | 100         |
| 24      | GrBNV_gp75-like protein                                       | 22837       | 22256  | 193  | reverse   | 24                         | 100         | 24      | 100         |
| 25      | GrBNV_gp76-like protein                                       | 22836       | 24494  | 553  | forward   | 25                         | 100         | 25      | 99.82       |
| 26      | hypothetical protein                                          | 24555       | 25718  | 388  | forward   | 26                         | 100         | 26      | 100         |
| 27      | GrBNV_gp78-like protein                                       | 26959       | 27574  | 402  | reverse   | 27                         | 100         | 27      | 100         |
| 28      | hypothetical protein                                          | 26990       | 27826  | 279  | reverse   | 28                         | 100         | 28      | 100         |
| 29      | GrBNV_gp81-like protein                                       | 28017       | 27838  | 259  | reverse   | 29                         | 100         | 29      | 100         |
| 30      | sfA                                                           | 28484       | 30613  | 710  | reverse   | 30                         | 99.3        | 30      | 99.72       |
| 31      | hypothetical protein                                          | 31045       | 30875  | 57   | reverse   | 31                         | 100         | 31      | 100         |
| 32      | 19 kDa protein                                                | 32493       | 31726  | 256  | reverse   | 32                         | 99.61       | 32      | 99.61       |
| 33      | dnahel                                                        | 32608       | 36330  | 1241 | forward   | 33                         | 100         | 33      | 99.84       |
| 34      | hypothetical protein                                          | 36703       | 36410  | 98   | reverse   | 34                         | 100         | 34      | 100         |
| 35      | hypothetical protein                                          | 37141       | 36719  | 141  | reverse   | 35                         | 99.29       | 35      | 100         |
| 36      | sfA/AC069                                                     | 38128       | 37202  | 309  | reverse   | 36                         | 99.55       | 36      | 100         |
| 37      | hypothetical protein                                          | 38441       | 38160  | 93   | reverse   | 37                         | 100         | 37      | 100         |
| 38      | GrBNV_gp83-like protein                                       | 38985       | 38526  | 190  | reverse   | 38                         | 100         | 38      | 100         |
| 39      | GrBNV_gp84-like protein                                       | 39069       | 39467  | 132  | forward   | 39                         | 100         | 39      | 100         |
| 40      | GrBNV_gp85-like protein                                       | 39439       | 39780  | 114  | forward   | 40                         | 99.12       | 40      | 100         |
| 41      | lef4 protein                                                  | 39756       | 40961  | 402  | forward   | 41                         | 99.75       | 41      | 100         |
| 42      | hypothetical protein                                          | 41108       | 40953  | 51   | reverse   | 42                         | 100         | 42      | 100         |
| 43      | GrBNV_gp97-like protein                                       | 41070       | 41600  | 197  | forward   | 43                         | 100         | 43      | 100         |
| 44      | GrBNV_gp23-like protein                                       | 42644       | 41673  | 324  | reverse   | 44                         | 100         | 44      | 100         |
| 45      | GrBNV_gp22-like protein                                       | 44268       | 42997  | 524  | reverse   | 45                         | 100         | 45      | 100         |
| 46      | GrBNV_gp19-like protein                                       | 45385       | 44474  | 303  | reverse   | 46                         | 100         | 46      | 100         |
| 47      | hypothetical protein                                          | 45893       | 45732  | 53   | reverse   | 47                         | 100         | 47      | 100         |
| 48      | hypothetical protein                                          | 46204       | 45992  | 71   | reverse   | 48                         | 97.18       | 48      | 100         |
| 49      | r1 protein                                                    | 46613       | 48826  | 738  | forward   | 49                         | 99.86       | 49      | 100         |
| 50      | sf5                                                           | 49125       | 48889  | 78   | reverse   | 50                         | 100         | 50      | 100         |
| 51      | GrBNV_gp84-like protein                                       | 49816       | 49189  | 215  | reverse   | 51                         | 100         | 51      | 100         |
| 52      | GrBNV_gp85-like protein                                       | 50470       | 51789  | 439  | forward   | 52                         | 99.77       | 52      | 100         |
| 53      | hypothetical protein                                          | 51970       | 51773  | 65   | reverse   | 53                         | 100         | 53      | 100         |
| 54      | hypothetical protein                                          | 53492       | 52149  | 448  | reverse   | 54                         | 100         | 54      | 100         |
| 55      | putatin-like phospholipase-like protein                       | 53625       | 54734  | 370  | forward   | 55                         | 99.73       | 55      | 100         |
| 56      | HZV_115-like protein                                          | 55402       | 54773  | 210  | reverse   | 56                         | 100         | 56      | 100         |
| 57      | lef3 protein                                                  | 56005       | 55487  | 173  | reverse   | 57                         | 100         | 57      | 100         |
| 58      | sf4 protein                                                   | 57584       | 56109  | 492  | reverse   | 58                         | 99.8        | 58      | 99.8        |
| 59      | GrBNV_gp86-like protein                                       | 57609       | 58016  | 116  | forward   | 59                         | 97.39       | 59      | 99.39       |
| 60      | hypothetical protein                                          | 58381       | 58115  | 89   | reverse   | 60                         | 100         | 60      | 100         |
| 61      | hypothetical protein                                          | 58335       | 58556  | 73   | forward   | 61                         | 100         | 61      | 100         |
| 62      | lef8 protein                                                  | 61350       | 58582  | 932  | reverse   | 62                         | 100         | 62      | 100         |
| 63      | hypothetical protein                                          | 61818       | 61636  | 61   | reverse   | 63                         | 100         | 63      | 100         |
| 64      | hypothetical protein                                          | 62325       | 62032  | 97   | reverse   | 64                         | 86.36       | 64      | 100         |
| 65      | hypothetical protein                                          | 62308       | 62559  | 84   | forward   | 65                         | 98.8        | 64      | 98.8        |
| 66      | hypothetical protein                                          | 62670       | 62528  | 115  | reverse   | 66                         | 76.56       | 66      | 100         |
| 67      | F3C protein-like protein                                      | 62172       | 62834  | 221  | forward   | 67                         | 100         | 65      | 100         |
| 68      | hypothetical protein                                          | 64152       | 64829  | 226  | forward   | 71                         | 99.56       | 67      | 100         |
| 69      | Ac88-like protein                                             | 65421       | 65011  | 137  | reverse   | 72                         | 100         | 68      | 100         |
| 70      | hypothetical protein                                          | 65697       | 66482  | 261  | forward   | 73                         | 99.23       | 69      | 100         |
| 71      | demosvirus NS3-like protein                                   | 66610       | 67482  | 291  | forward   | 74                         | 98.97       | 70      | 100         |
| 72      | integrase/recombinase-like protein                            | 68623       | 67529  | 365  | reverse   | 75                         | 100         | 71      | 100         |
| 73      | GrBNV_gp88-like protein                                       | 68670       | 68825  | 52   | reverse   | 76                         | 100         | 72      | 100         |
| 74      | semaphorin-like protein                                       | 68918       | 69797  | 123  | reverse   | 77                         | 100         | 73      | 100         |
| 75      | semaphorin-like protein                                       | 69205       | 70599  | 421  | forward   | 78                         | 100         | 74      | 100         |
| 76      | GrBNV_gp59-like protein                                       | 70610       | 70861  | 84   | forward   | 79                         | 100         | 75      | 100         |
| 77      | GrBNV_gp60-like protein                                       | 71596       | 71009  | 196  | reverse   | 80                         | 98.98       | 76      | 99.49       |
| 78      | hypothetical protein                                          | 71727       | 72035  | 102  | forward   | 81                         | 85.29       | 77      | 100         |
| 79      | polysaccharide lyase family 6-like protein                    | 73637       | 72336  | 433  | reverse   | 83/84                      | 99.49/98.78 | 77/78   | 99.49/98.78 |
| 80      | GrBNV_gp61-like protein                                       | 74464       | 73895  | 189  | reverse   | 86                         | 100         | 80      | 100         |
| 81      | sf6 protein                                                   | 74427       | 75266  | 268  | forward   | 87                         | 100         | 81      | 100         |
| 82      | hypothetical protein                                          | 75270       | 75500  | 77   | forward   | 88                         | 100         | 82      | 100         |
| 83      | hypothetical protein                                          | 75933       | 75646  | 96   | reverse   | 89                         | 98.95       | 83      | 98.95       |
| 84      | GrBNV_gp28-like protein                                       | 78434       | 76216  | 1074 | reverse   | 90                         | 98.06       | 84      | 99.16       |
| 85      | hypothetical protein                                          | 80141       | 80491  | 116  | forward   | 92                         | 64.81       | 85      | 64.81       |
| 86      | hypothetical protein                                          | 80612       | 80415  | 65   | reverse   | 93                         | 98.46       | 86      | 98.46       |
| 87      | hypothetical protein                                          | 80857       | 81171  | 105  | forward   | 94                         | 98.08       | 87      | 99.04       |
| 88      | GrBNV_gp69-like protein                                       | 81235       | 82488  | 418  | forward   | 95                         | 100         | 88      | 100         |
| 89      | lef9 protein                                                  | 84350       | 82880  | 556  | reverse   | 96                         | 99.64       | 89      | 99.82       |
| 90      | mRNA decapping protein 2-like protein                         | 84232       | 85017  | 262  | forward   | 97                         | 98.86       | 90      | 99.62       |
| 91      | hypothetical protein                                          | 85598       | 85137  | 154  | reverse   | 98                         | 100         | 91      | 100         |
| 92      | Ac120-like protein                                            | 85795       | 85592  | 67   | reverse   | 99                         | 92.42       | 92      | 91.04       |
| 93      | hypothetical protein                                          | 85812       | 86075  | 88   | forward   | 131                        | 85.71       | 125     | 85.71       |
| 94      | hypothetical protein                                          | 86098       | 86259  | 54   | forward   | 100                        | 100         | 93      | 100         |
| 95      | hypothetical protein                                          | 86084       | 86403  | 94   | reverse   | 101                        | 100         | 94      | 98.53       |
| 96      | sf2 protein                                                   | 86785       | 87907  | 421  | reverse   | 102                        | 99.75       | 95      | 100         |
| 97      | hypothetical protein                                          | 88982       | 89177  | 361  | forward   | 103                        | 98.89       | 96      | 100         |
| 98      | GrBNV_gp62-like protein                                       | 89461       | 89174  | 96   | reverse   | 104                        | 98.95       | 97      | 100         |
| 99      | GrBNV_gp43-like protein                                       | 90585       | 89518  | 356  | reverse   | 105                        | 100         | 98      | 100         |
| 100     | vp91 protein                                                  | 90678       | 92657  | 660  | forward   | 106                        | 99.85       | 99      | 100         |
| 101     | pf3 protein                                                   | 92700       | 93314  | 205  | forward   | 107                        | 100         | 100     | 100         |
| 102     | DNA helicase 2                                                | 95847       | 93385  | 821  | reverse   | 108                        | 100         | 101     | 100         |
| 103     | hypothetical protein                                          | 96421       | 96687  | 88   | forward   | 109                        | 97.73       | 102     | 100         |
| 104     | hypothetical protein                                          | 96710       | 96919  | 70   | forward   | 110                        | 100         | 103     | 100         |
| 105     | hypothetical protein                                          | 97176       | 97328  | 50   | forward   | 111                        | 98          | 104     | 98          |
| 106     | hypothetical protein                                          | 97499       | 97651  | 50   | forward   | 112                        | 98          | 105     | 98          |
| 107     | Ac92-like protein                                             | 99030       | 97756  | 425  | reverse   | 113                        | 99.76       | 106     | 100         |
| 108     | GrBNV_gp06-like protein                                       | 99196       | 100611 | 472  | forward   | 114                        | 100         | 107     | 99.79       |
| 109     | Pf8-5                                                         | 100624      | 102059 | 412  | reverse   | 115                        | 99.76       | 108     | 99.52       |
| 110     | GrBNV_gp33-like protein                                       | 101317      | 102056 | 354  | reverse   | 116                        | 100         | 109     | 100         |
| 111     | thymidylate kinase-like protein                               | 104186      | 103170 | 338  | reverse   | 117                        | 100         | 110     | 100         |
| 112     | GrBNV_gp35-like protein                                       | 104185      | 104976 | 264  | forward   | 118                        | 100         | 111     | 100         |
| 113     | GrBNV_gp36-like protein                                       | 105037      | 106167 | 376  | forward   | 119                        | 100         | 112     | 100         |
| 114     | GrBNV_gp37-like protein                                       | 108275      | 106230 | 682  | reverse   | 120                        | 99.71       | 113     | 99.71       |
| 115     | DNA ligase                                                    | 109446      | 108373 | 358  | reverse   | 121                        | 100         | 114     | 100         |
| 116     | GrBNV_gp39-like protein                                       | 109477      | 109959 | 161  | forward   | 122                        | 100         | 115     | 100         |
| 117     | GrBNV_gp41-like protein                                       | 110392      | 109994 | 143  | reverse   | 123                        | 100         | 116     | 100         |
| 118     | hypothetical protein                                          | 111617      | 110373 | 415  | reverse   | 124                        | 99.04       | 117     | 99.75       |
| 119     | GrBNV_gp44-like protein                                       | 112699      | 111680 | 340  | reverse   | 125                        | 99.71       | 118     | 100         |
| 120     | pf4 protein                                                   | 112813      | 115023 | 737  | forward   | 126                        | 99.86       | 119     | 99.86       |
| 121     | hypothetical protein                                          | 113753      | 115208 | 56   | reverse   | 127                        | 98.18       | 120     | 100         |
| 122     | hypothetical protein                                          | 115589      | 115398 | 63   | reverse   | 109                        | 82.35       | 102     | 82.35       |
| 123     | isp-3                                                         | 116441      | 118216 | 592  | forward   | 134                        | 99.46       | 122     | 98.91       |
| 124     | hypothetical protein                                          | 118382      | 119212 | 277  | forward   | 133                        | 96.84       | 123     | 100         |
| 125     | GrBNV_gp48-like protein                                       | 121055      | 119292 | 588  | reverse   | 132                        | 98.32       | 124     | 99.66       |
| 126     | hypothetical protein                                          | 121107      | 121484 | 125  | forward   | 131                        | 94.96       | 125     | 100         |
| 127     | hypothetical protein                                          | 121675      | 121884 | 69   | forward   | 130                        | 100         | 126     | 100         |
| 128     | hypothetical protein                                          | 121881      | 122111 | 76   | forward   | 136                        | 98.9        | 127     | 99.18       |
| 129     | hypothetical protein                                          | 123286      | 122192 | 365  | reverse   | 137                        | 100         | 128     | 100         |
| 130     | GrBNV_gp17-like protein                                       | 123340      | 124803 | 487  | forward   | 138                        | 100         | 129     | 100         |
| 131     | hypothetical protein                                          | 124950      | 125417 | 156  | forward   | 138                        | 100         | 129     | 100         |
| 132     | hypothetical protein                                          | 125746      | 125507 | 79   | reverse   | 139                        | 100         | 130     | 100         |
